# Supplementary material
Source: Copernicus journal article supplement (doi:10.5194/egusphere-2026-1516)
Supplement: Supplementary file 1 [file egusphere-2026-1516-supplement.pdf]

# Supplementary materials for paper “Evaluating the radiative fidelity of PALM (v25.04) in high-resolution: impact of diverse urban morphology and vegetation on short-wave radiation”

Jelena Radović<sup>1</sup>, Michal Belda<sup>1</sup>, Martin Bureš<sup>2</sup>, Kryštof Eben<sup>2</sup>, Jan Geletič<sup>1,2</sup>, Jakub Jura<sup>3</sup>, Pavel Krč<sup>2</sup>, Hynek Řezníček<sup>2</sup>, and Jaroslav Resler<sup>2</sup>

<sup>1</sup>Department of Atmospheric Physics, Faculty of Mathematics and Physics, Charles University Prague, V Holešovičkách 2, 180 00 Prague 8, Czech Republic

<sup>2</sup>Department of Complex Systems, Institute of Computer Science of the Czech Academy of Sciences, Pod Vodárenskou věží 271/2, 182 00 Prague, Czech Republic

<sup>3</sup>Department of Instrumentation and Control Engineering, Faculty of Mechanical Engineering, Czech Technical University in Prague, Technická 4, 166 07 Praha 6, Czech Republic

**Correspondence:** Jelena Radović (jelena.radovic@matfyz.cuni.cz)

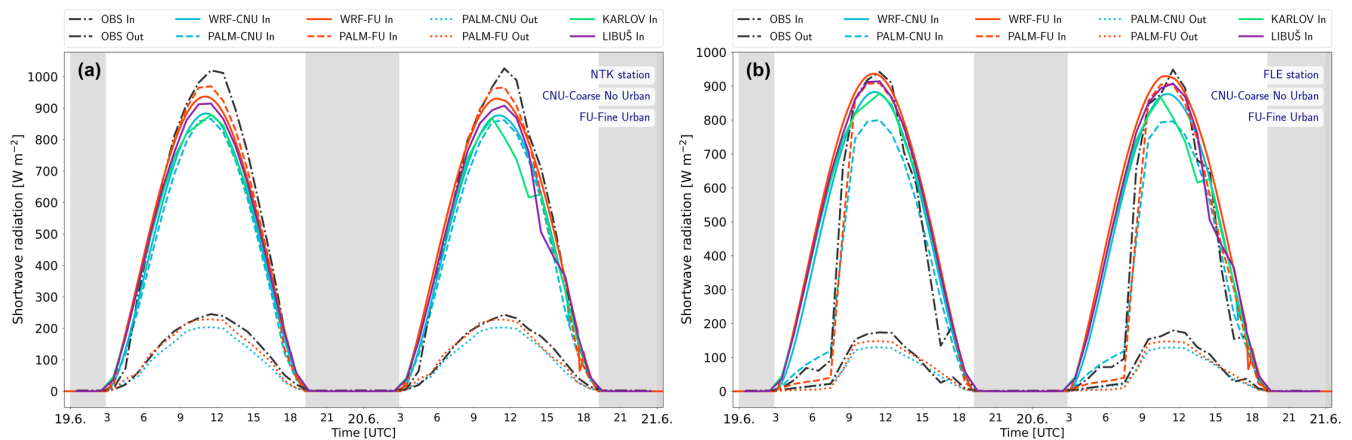

**Figure S1.** The comparison of observed hourly averages of incoming (In) and outgoing (Out) short-wave radiation for the e1 episode at the stations NTK (a) and FLE (b), with PALM model outputs for both WRF configurations. Additional lines represent the raw WRF outputs, Coarse No Urban (WRF-CNU), and Fine Urban (WRF-FU), and measurements from professional meteorological stations in Karlov and Libuš.

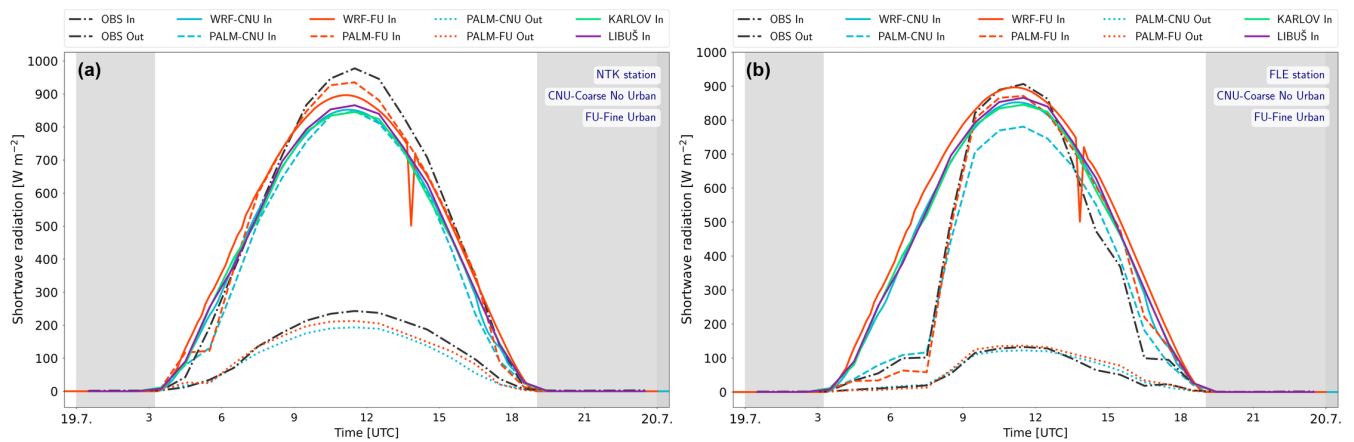

**Figure S2.** The comparison of observed hourly averages of incoming (In) and outgoing (Out) short-wave radiation for the e2 episode at the stations NTK (a) and FLE (b), with PALM model outputs for both WRF configurations. Additional lines represent the raw WRF outputs, Coarse No Urban (WRF-CNU), and Fine Urban (WRF-FU), and measurements from professional meteorological stations in Karlov and Libuš.

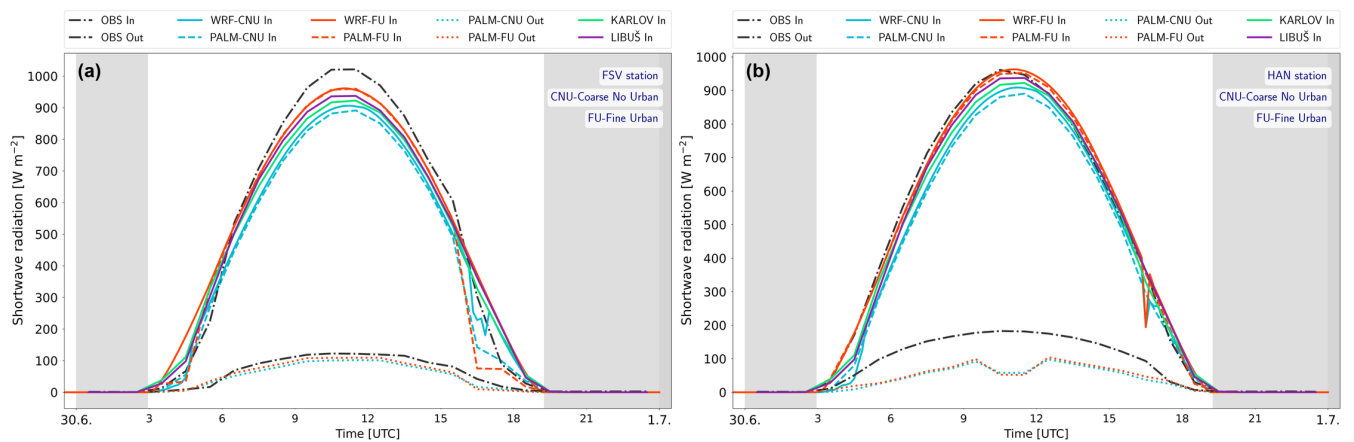

**Figure S3.** The comparison of observed hourly averages of incoming (In) and outgoing (Out) short-wave radiation for the e4 episode at the stations FSV (a) and HAN (b), with PALM model outputs for both WRF configurations. Additional lines represent the raw WRF outputs, Coarse No Urban (WRF-CNU), and Fine Urban (WRF-FU), and measurements from professional meteorological stations in Karlov and Libuš.

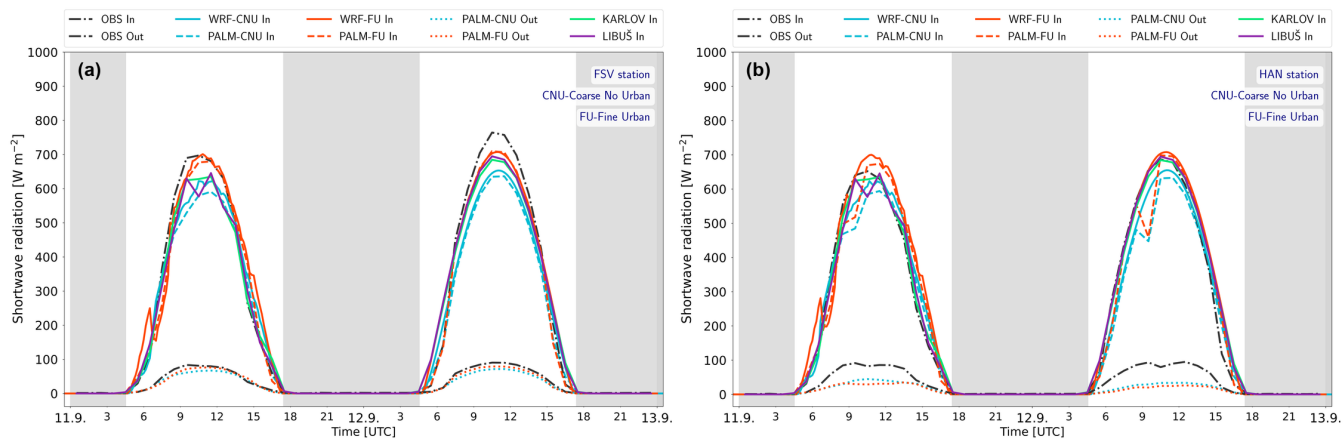

**Figure S4.** The comparison of observed hourly averages of incoming (In) and outgoing (Out) short-wave radiation for the e6 episode at the stations FSV (a) and HAN (b), with PALM model outputs for both WRF configurations. Additional lines represent the raw WRF outputs, Coarse No Urban (WRF-CNU), and Fine Urban (WRF-FU), and measurements from professional meteorological stations in Karlov and Libuš.

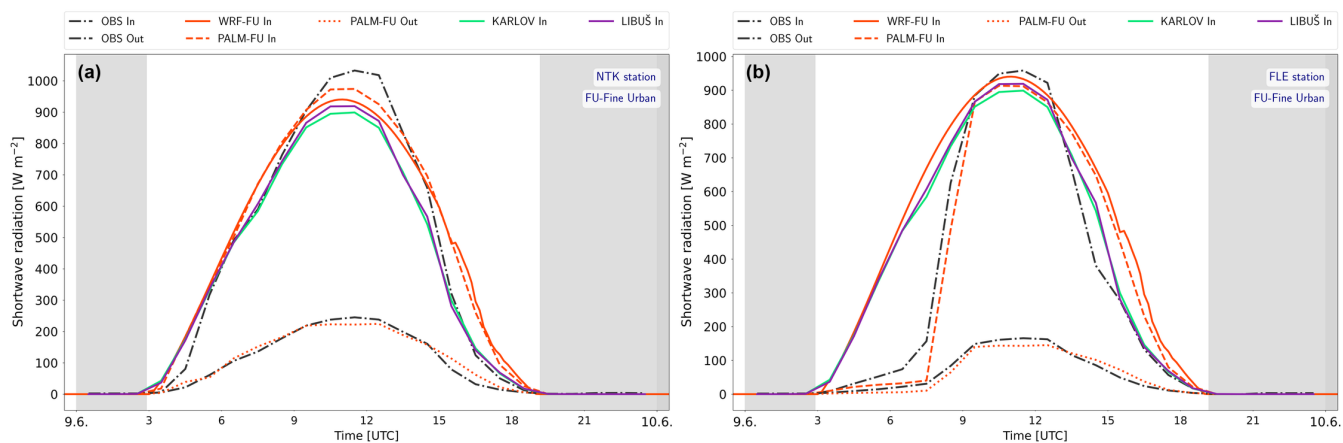

**Figure S5.** The comparison of observed hourly averages of incoming (In) and outgoing (Out) short-wave radiation for the e7 episode at the stations NTK (a) and FLE (b), with PALM model output for WRF Fine Urban (WRF-FU) configuration. Additional lines represent the raw WRF output, Fine Urban (WRF-FU), and measurements from professional meteorological stations in Karlov and Libuš.

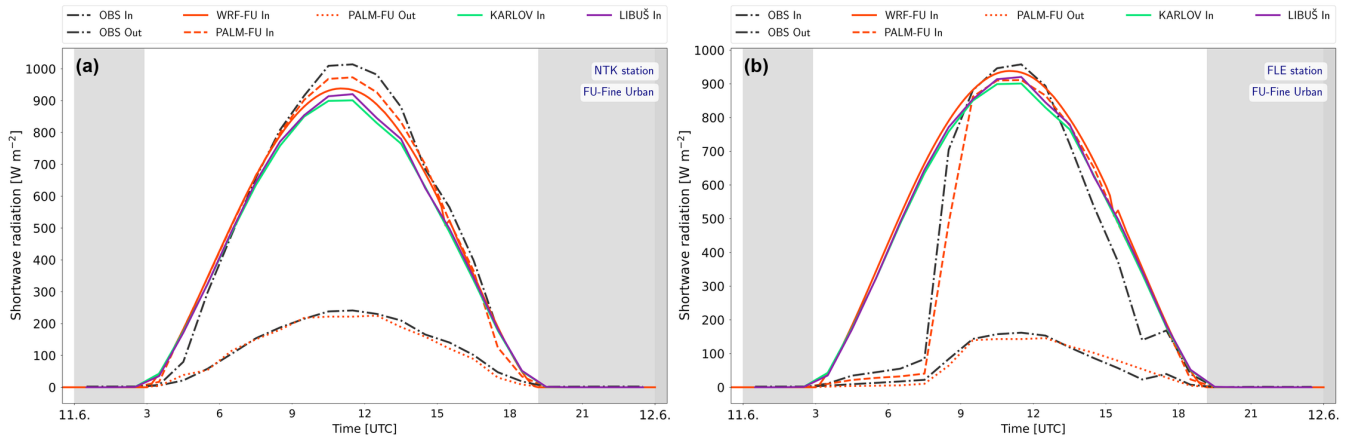

**Figure S6.** The comparison of observed hourly averages of incoming (In) and outgoing (Out) short-wave radiation for the e8 episode at the stations NTK (a) and FLE (b), with PALM model output for WRF Fine Urban (WRF-FU) configuration. Additional lines represent the raw WRF output, Fine Urban (WRF-FU), and measurements from professional meteorological stations in Karlov and Libuš.

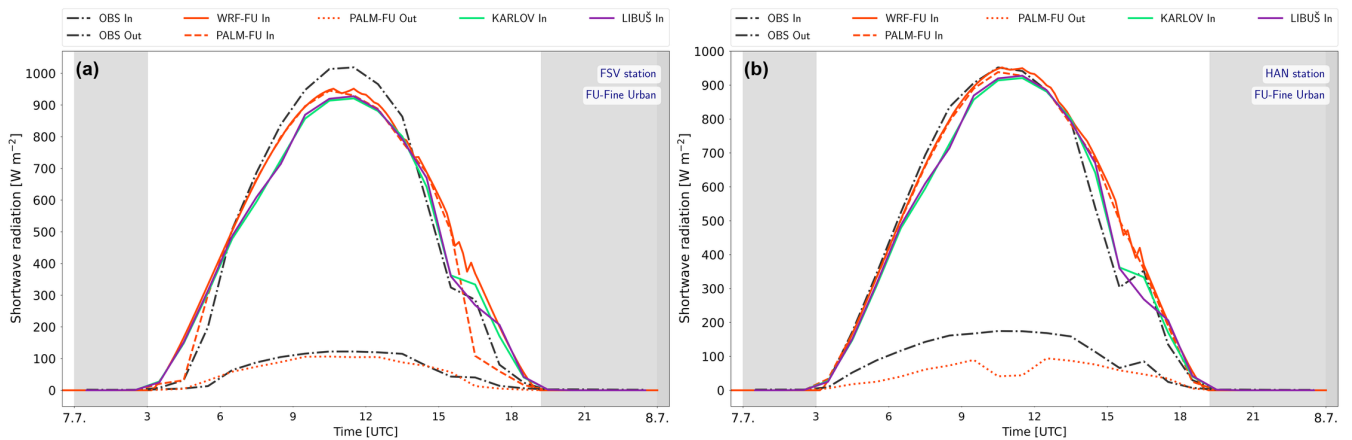

**Figure S7.** The comparison of observed hourly averages of incoming (In) and outgoing (Out) short-wave radiation for the e11 episode at the stations FSV (a) and HAN (b), with PALM model output for WRF Fine Urban (WRF-FU) configuration. Additional lines represent the raw WRF output, Fine Urban (WRF-FU), and measurements from professional meteorological stations in Karlov and Libuš.

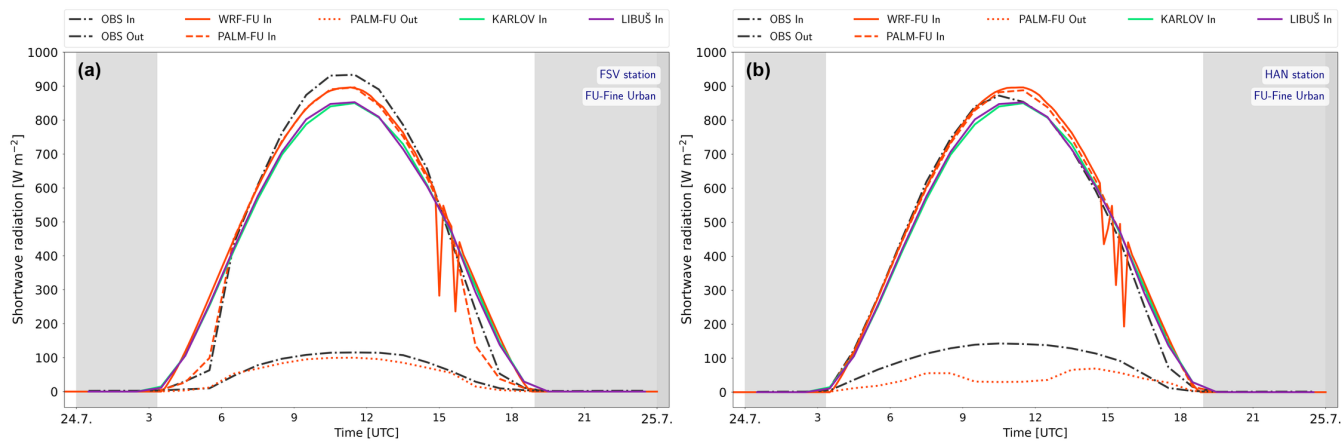

**Figure S8.** The comparison of observed hourly averages of incoming (In) and outgoing (Out) short-wave radiation for the e13 episode at the stations FSV (a) and HAN (b), with PALM model output for WRF Fine Urban (WRF-FU) configuration. Additional lines represent the raw WRF output, Fine Urban (WRF-FU), and measurements from professional meteorological stations in Karlov and Libuš.

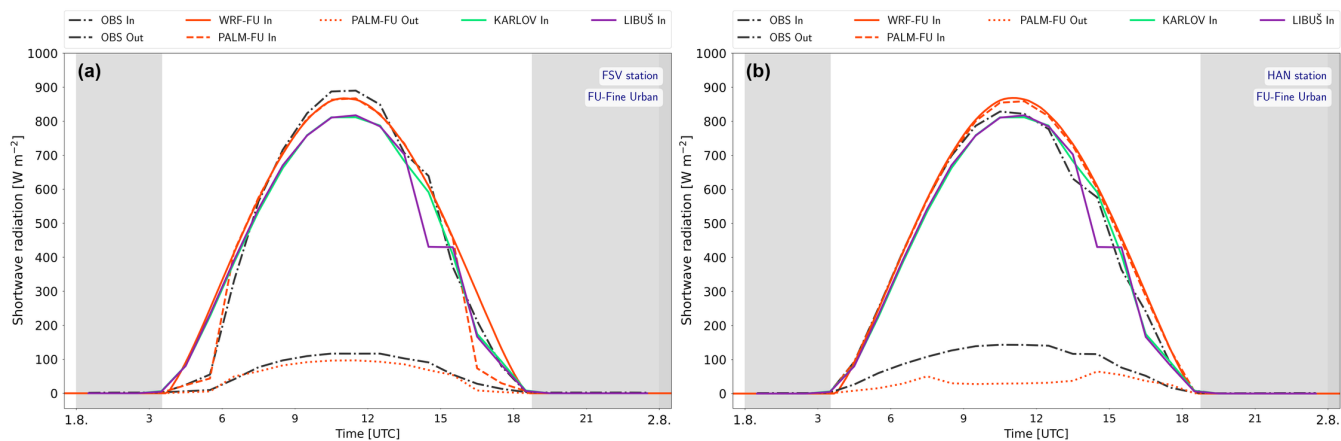

**Figure S9.** The comparison of observed hourly averages of incoming (In) and outgoing (Out) short-wave radiation for the e14 episode at the stations FSV (a) and HAN (b), with PALM model output for WRF Fine Urban (WRF-FU) configuration. Additional lines represent the raw WRF output, Fine Urban (WRF-FU), and measurements from professional meteorological stations in Karlov and Libuš.

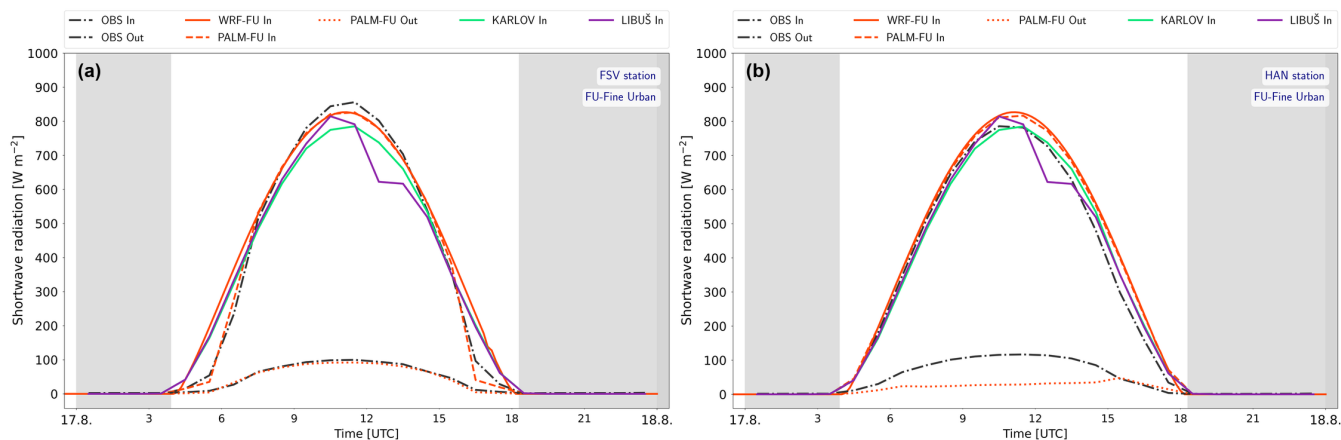

**Figure S10.** The comparison of observed hourly averages of incoming (In) and outgoing (Out) short-wave radiation for the e15 episode at the stations FSV (a) and HAN (b), with PALM model output for WRF Fine Urban (WRF-FU) configuration. Additional lines represent the raw WRF output, Fine Urban (WRF-FU), and measurements from professional meteorological stations in Karlov and Libuš.

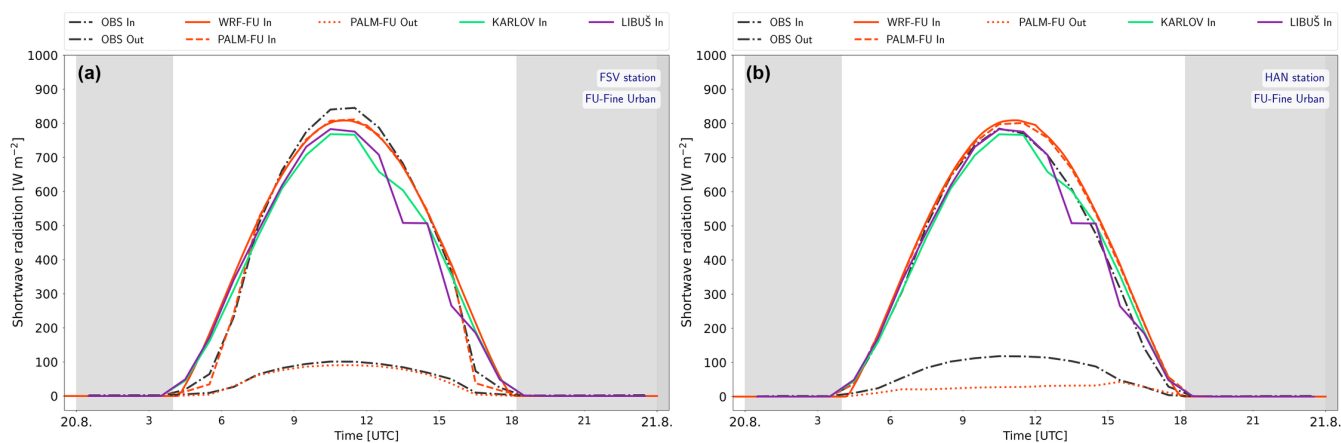

**Figure S11.** The comparison of observed hourly averages of incoming (In) and outgoing (Out) short-wave radiation for the e16 episode at the stations FSV (a) and HAN (b), with PALM model output for WRF Fine Urban (WRF-FU) configuration. Additional lines represent the raw WRF output, Fine Urban (WRF-FU), and measurements from professional meteorological stations in Karlov and Libuš.

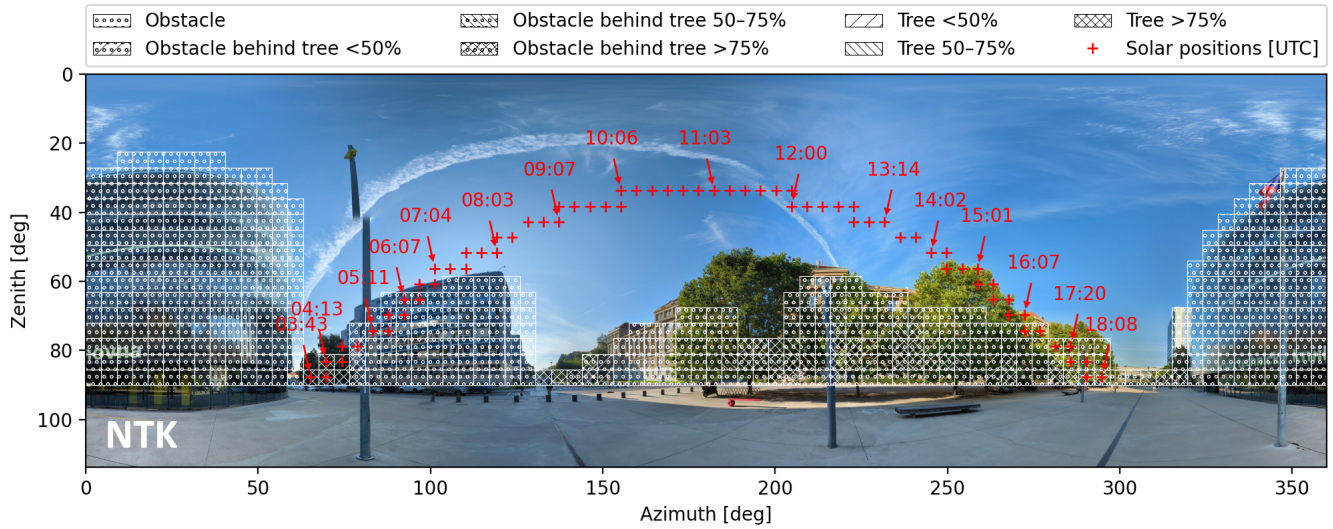

**Figure S12.** Hemispherical view at the NTK observation site with obstructions and vegetation as modelled by PALM, plotted in azimuth–zenith coordinates. Trees and obstacles are classified according to their fractional area coverage. Red crosses indicate the Sun’s trajectory throughout the day, with annotated timestamps in UTC.

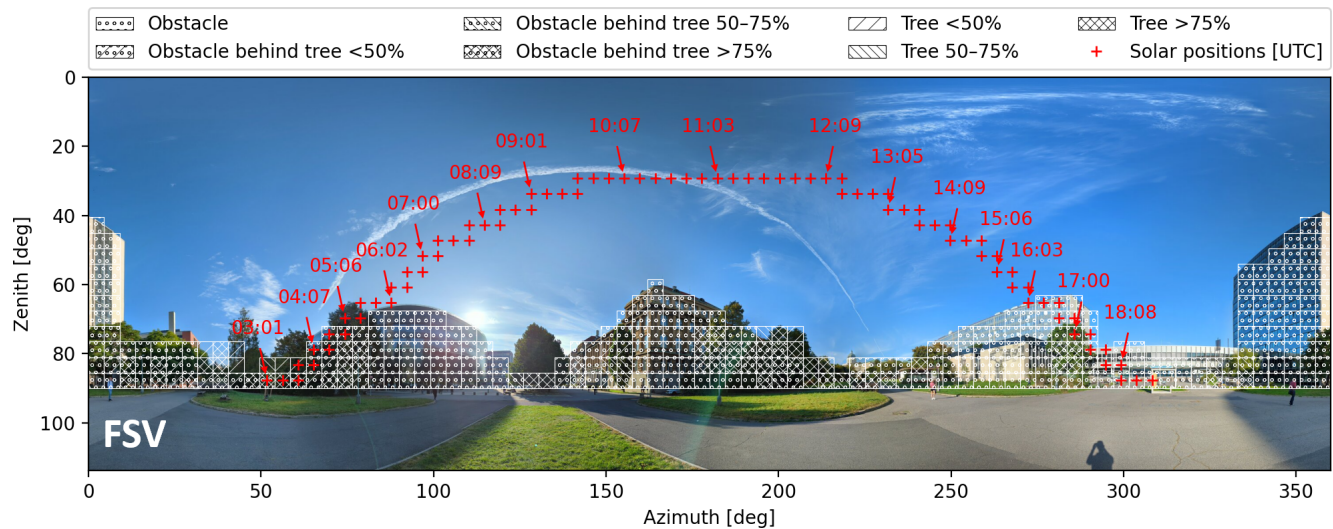

**Figure S13.** Hemispherical view at the FSV observation site with obstructions and vegetation as modelled by PALM, plotted in azimuth–zenith coordinates. Trees and obstacles are classified according to their fractional area coverage. Red crosses indicate the Sun’s trajectory throughout the day, with annotated timestamps in UTC.

**Table S1.** Synoptic weather types and frontal systems crossing through Prague during selected episodes in 2017 and 2018.

| Date            | Weather type                                  | Front crossings     |           |                  |           |
|-----------------|-----------------------------------------------|---------------------|-----------|------------------|-----------|
|                 |                                               | Crossing time [UTC] | Type      | Direction (from) | Intensity |
| <b>2017</b>     |                                               |                     |           |                  |           |
| 09 June         | Western anticyclone<br>of summer type (Wal)   | 18                  | Cold      | West             | Medium    |
|                 |                                               | 23                  | Cold      | West             | Medium    |
| 11 June         | Western anticyclone<br>of summer type (Wal)   | 7                   | Warm      | South West       | Weak      |
|                 |                                               | 22                  | Warm      | South West       | Weak      |
| 19–20 June      | Anticyclone/<br>Travelling anticyclone (A/Ap) | 9<br>(20 Jun.)      | Cold      | North West       | Weak      |
| 07 July         | Western cyclone (Wc)                          | 1                   | Cold      | Western          | Medium    |
| 19 July         | Western anticyclone<br>of summer type (Wal)   | No data             | No data   | No data          | No data   |
| 07 August       | Traveling anticyclone (Ap)                    | No data             | No data   | No data          | No data   |
| <b>2018</b>     |                                               |                     |           |                  |           |
| 16 June         | North East<br>anticyclone (Nea)               | No data             | No data   | No data          | No data   |
| 30 June         | North East<br>anticyclone (Nea)               | No data             | No data   | No data          | No data   |
| 02–03 July      | North West<br>anticyclone (Nwa)               | No data             | No data   | No data          | No data   |
| 07 July         | North West<br>anticyclone (Nwa)               | 17                  | Occlusive | North West       | Weak      |
| 21 July         | Low pressure<br>trough (B)                    | 17                  | Occlusive | South West       | Medium    |
| 24 July         | North West<br>anticyclone (Nwa)               | No data             | No data   | No data          | No data   |
| 01 August       | Eastern anticyclone (Ea)                      | No data             | No data   | No data          | No data   |
| 17 August       | Western anticyclone<br>of summer type (Wal)   | 23                  | Cold      | West             | Medium    |
| 20 August       | Western anticyclone<br>of summer type (Wal)   | 2                   | Warm      | West             | Weak      |
|                 |                                               | 15                  | Cold      | North West       | Medium    |
| 11–12 September | Western anticyclone<br>of summer type (Wal)   | 2 (11 Sept.)        | Occlusive | West             | Medium    |
|                 |                                               | 9 (11 Sept.)        | Warm      | West             | Medium    |
|                 |                                               | 12 Sept.            | No data   | No data          | No data   |

**Table S2.** WRF albedo during 2017 and 2018 at observation stations. WRF-1 km domain.

| <b>Date</b>     | <b>Station</b> | <b>Mean Albedo</b> | <b>Albedo at Noon</b> | <b>Albedo (Noon Avg. +-1 h)</b> |
|-----------------|----------------|--------------------|-----------------------|---------------------------------|
| 2017            |                |                    |                       |                                 |
| 09 June         | FLE            | 0.199              | 0.156                 | 0.156                           |
|                 | NTK            | 0.199              | 0.156                 | 0.156                           |
| 11 June         | FLE            | 0.173              | 0.156                 | 0.157                           |
|                 | NTK            | 0.173              | 0.156                 | 0.157                           |
| 19–20 June      | FLE            | 0.174              | 0.167                 | 0.157                           |
|                 | NTK            | 0.174              | 0.167                 | 0.157                           |
| 07 July         | FLE            | 0.213              | 0.353                 | 0.228                           |
|                 | NTK            | 0.213              | 0.353                 | 0.228                           |
| 19 July         | FLE            | 0.181              | 0.157                 | 0.156                           |
|                 | NTK            | 0.181              | 0.157                 | 0.156                           |
| 07 August       | FLE            | 0.180              | 0.155                 | 0.155                           |
|                 | NTK            | 0.180              | 0.155                 | 0.155                           |
| 2018            |                |                    |                       |                                 |
| 16 June         | FSV            | 0.197              | 0.156                 | 0.157                           |
|                 | HAN            | 0.213              | 0.158                 | 0.158                           |
| 30 June         | FSV            | 0.172              | 0.156                 | 0.156                           |
|                 | HAN            | 0.172              | 0.158                 | 0.158                           |
| 02–03 July      | FSV            | 0.173              | 0.167                 | 0.157                           |
|                 | HAN            | 0.173              | 0.167                 | 0.158                           |
| 07 July         | FSV            | 0.184              | 0.176                 | 0.192                           |
|                 | HAN            | 0.183              | 0.179                 | 0.191                           |
| 21 July         | FSV            | 0.206              | 0.169                 | 0.169                           |
|                 | HAN            | 0.206              | 0.169                 | 0.169                           |
| 24 July         | FSV            | 0.184              | 0.156                 | 0.156                           |
|                 | HAN            | 0.184              | 0.158                 | 0.158                           |
| 01 August       | FSV            | 0.176              | 0.164                 | 0.163                           |
|                 | HAN            | 0.176              | 0.163                 | 0.163                           |
| 17 August       | FSV            | 0.171              | 0.154                 | 0.154                           |
|                 | HAN            | 0.172              | 0.156                 | 0.156                           |
| 20 August       | FSV            | 0.170              | 0.154                 | 0.154                           |
|                 | HAN            | 0.171              | 0.156                 | 0.156                           |
| 11–12 September | FSV            | 0.190              | 0.313                 | 0.168                           |
|                 | HAN            | 0.192              | 0.309                 | 0.171                           |

**Table S3.** WRF albedo during 2017 and 2018 at observation stations. WRF–3 km domain.

| <b>Date</b>     | <b>Station</b> | <b>Mean Albedo</b> | <b>Albedo at Noon</b> | <b>Albedo (Noon Avg. +-1 h)</b> |
|-----------------|----------------|--------------------|-----------------------|---------------------------------|
| 2017            |                |                    |                       |                                 |
| 19–20 June      | FLE            | 0.144              | 0.144                 | 0.144                           |
|                 | NTK            | 0.144              | 0.144                 | 0.144                           |
| 19 July         | FLE            | 0.140              | 0.140                 | 0.140                           |
|                 | NTK            | 0.140              | 0.140                 | 0.140                           |
| 07 August       | FLE            | 0.135              | 0.135                 | 0.135                           |
|                 | NTK            | 0.135              | 0.135                 | 0.135                           |
| 2018            |                |                    |                       |                                 |
| 30 June         | FSV            | 0.142              | 0.142                 | 0.142                           |
|                 | HAN            | 0.152              | 0.152                 | 0.152                           |
| 02–03 July      | FSV            | 0.142              | 0.142                 | 0.142                           |
|                 | HAN            | 0.151              | 0.151                 | 0.151                           |
| 11–12 September | FSV            | 0.126              | 0.127                 | 0.126                           |
|                 | HAN            | 0.132              | 0.133                 | 0.132                           |

**Table S4.** Average albedo values per station. WRF–1 km domain.

| <b>Station</b> | <b>Avg (Mean)</b> | <b>Avg (Noon)</b> | <b>Avg (Noon Avg)</b> |
|----------------|-------------------|-------------------|-----------------------|
| FLE [213, 149] | 0.187             | 0.190             | 0.168                 |
| NTK [213, 149] | 0.187             | 0.190             | 0.168                 |
| FSV [213, 149] | 0.182             | 0.176             | 0.162                 |
| HAN [213, 148] | 0.184             | 0.177             | 0.163                 |

**Table S5.** Average albedo values per station. WRF–3 km domain.

| <b>Station</b> | <b>Avg (Mean)</b> | <b>Avg (Noon)</b> | <b>Avg (Noon Avg)</b> |
|----------------|-------------------|-------------------|-----------------------|
| FLE [75, 70]   | 0.139             | 0.140             | 0.139                 |
| NTK [75, 70]   | 0.139             | 0.140             | 0.139                 |
| FSV [75, 70]   | 0.137             | 0.137             | 0.137                 |
| HAN [75, 69]   | 0.145             | 0.145             | 0.145                 |

## 1 Statistical evaluation

Considering that  $M_i$  is the PALM-simulated value,  $\overline{M}$  is the mean of all PALM-simulated values,  $O_i$  is the observed value,  $\overline{O}$  is the mean of the observations, and  $n$  is the total number of paired samples, the following formulas are applied for the statistical evaluation:

### 5 1.1 Mean Bias Error MBE

$$\text{MBE} = \frac{1}{n} \sum_{i=1}^n (M_i - O_i)$$

### 1.2 Root Mean Square Error RMSE

$$\text{RMSE} = \sqrt{\frac{1}{n} \sum_{i=1}^n (M_i - O_i)^2}$$

### 1.3 Pearson correlation coefficient r

$$10 \quad r = \frac{\sum_{i=1}^n (M_i - \overline{M})(O_i - \overline{O})}{\sqrt{\sum_{i=1}^n (M_i - \overline{M})^2 - \sum_{i=1}^n (O_i - \overline{O})^2}}$$

### 1.4 Coefficient of determination R<sup>2</sup>

$$R^2 = 1 - \frac{\sum_{i=1}^n (O_i - M_i)^2}{\sum_{i=1}^n (O_i - \overline{O})^2}$$

### 1.5 Spearman's correlation coefficient $\rho$

$$\rho = 1 - \frac{6 \sum_{i=1}^n d_i^2}{n(n^2 - 1)}; d_i = \text{rank}(M_i) - \text{rank}(O_i)$$

### 15 1.6 Kendall's correlation coefficient $\tau$

$$\tau = \frac{N_c - N_d}{\frac{1}{2}n(n^2 - 1)}; \text{where } N_c \text{ and } N_d \text{ are the numbers of concordant and discordant pairs, respectively.}$$

### 1.7 Index of Agreement (d; Willmott, 1981)

$$d = 1 - \frac{\sum_{i=1}^n (M_i - O_i)^2}{\sum_{i=1}^n (|M_i - \overline{O}| + |O_i - \overline{O}|)^2}$$

### 1.8 Absolute difference AD

$$20 \quad \text{AD} = \frac{1}{n} \sum_{i=1}^n |M_i - O_i|$$

### 1.9 Relative Difference RD

$$\text{RD} = \frac{1}{n} \sum_{i=1}^n \left( \frac{M_i - O_i}{O_i} \right) \times 100\%$$

## References

Willmott, C. J.: ON THE VALIDATION OF MODELS, *Physical Geography*, 2, 184–194, <https://doi.org/10.1080/02723646.1981.10642213>,

25 1981.
